# Supplementary material
Source: publisher site journal article supplement (https://www.spandidos-publications.com/3680/downloadSupplementary)
Supplement: Supplementary file 1 [file downloadSupplementary]

Figure S1. Analysis of the difference in the content of flora in UC group and normal group.

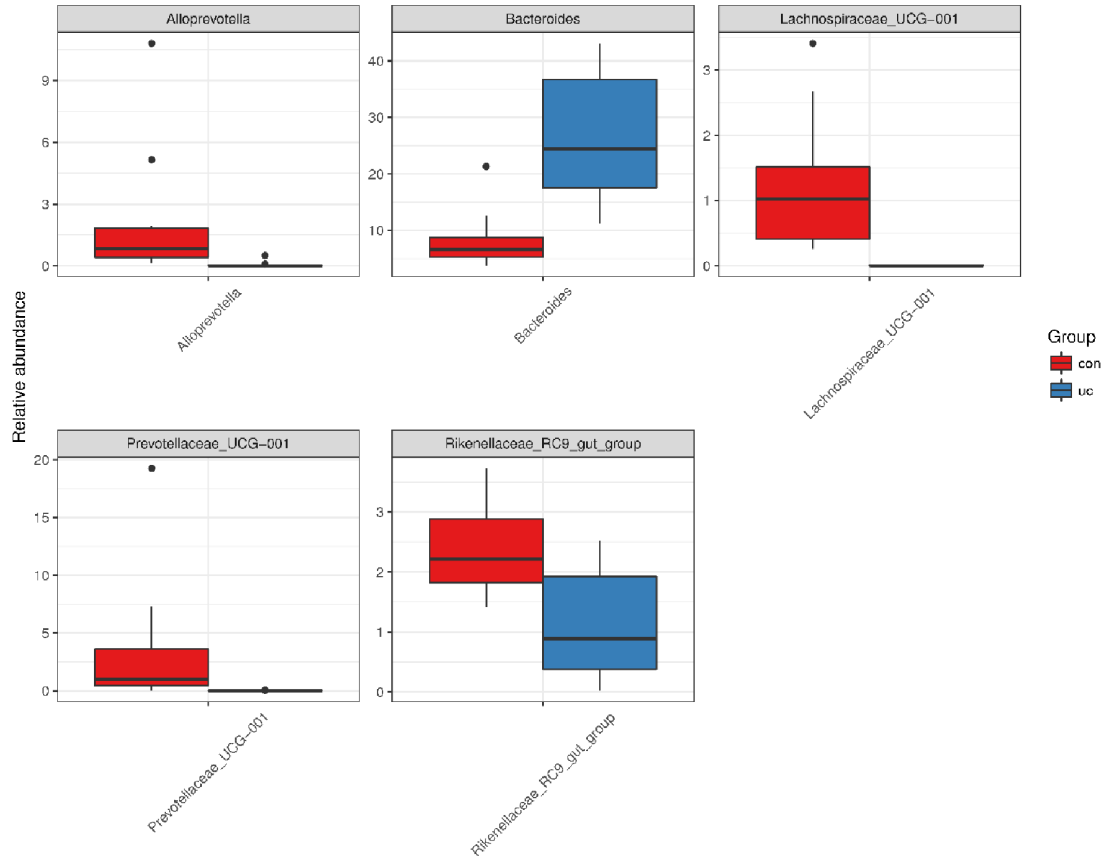

Table SI. Disease activity index.

| Score | Weight loss (%) | Stool consistency | Occult/gross bleeding |
|-------|-----------------|-------------------|-----------------------|
| 0     | (-)             | Normal            | Normal                |
| 1     | 1-5             |                   |                       |
| 2     | 5-10            | Loose             | Guaiac (+)            |
| 3     | 11-15           |                   |                       |
| 4     | >15             | Diarrhea          | Gross bleeding        |

Table SII. Pathologic score evaluation.

| Score | Inflammatory cells infiltration                  | Epithelial damaged                                                                       |
|-------|--------------------------------------------------|------------------------------------------------------------------------------------------|
| 0     | Little or none in Lamina propria                 | Mucosa is not damaged                                                                    |
| 1     | Increased neutrophils in propria                 | Discontinuous epithelial damage                                                          |
| 2     | Aggregation of inflammatory cells to submucosa   | Mucosa ulcer                                                                             |
| 3     | Inflammatory cells penetrate the intestinal wall | Extensive mucosal damage or damage extended to the deep structure of the intestinal wall |

Table SIII. Correlation between specific bacteria and histopathological score, IL-12 and IL-23 levels.

| Comparator | Alloprevotella      | Bacteroides        | Prevotellaceae      | Rikenellaceae       | <i>Lachnospiraceae-UCG-001</i> |
|------------|---------------------|--------------------|---------------------|---------------------|--------------------------------|
| Score      | r=-0.943<br>P=0.001 | r=0.977<br>P=0.001 | r=-0.162<br>P=0.728 | r=-0.971<br>P=0.001 | r=-0.973<br>P=<0.001           |
| IL-12      | r=0.767<br>P=0.075  | r=-0.548<br>P=0.26 | r=0.757<br>P=0.082  | r=0.627<br>P=0.183  | r=0.460<br>P=0.358             |
| IL-23      | r=-0.669<br>P=0.1   | r=0.924<br>P=0.008 | r=-0.395<br>P=0.381 | r=-0.814<br>P=0.049 | r=-0.873<br>P=0.01             |

IL, interleukin.
